# Supplementary material for: Quantitative LC-MS/MS method for nivolumab in human serum using IgG purification and immobilized tryptic digestion
Source: Royal Society of Chemistry journal article supplement (doi:10.1039/c9ay02087j), 2019-11-25
Supplement: c9ay02087j1.pdf [file c9ay02087j1.pdf]

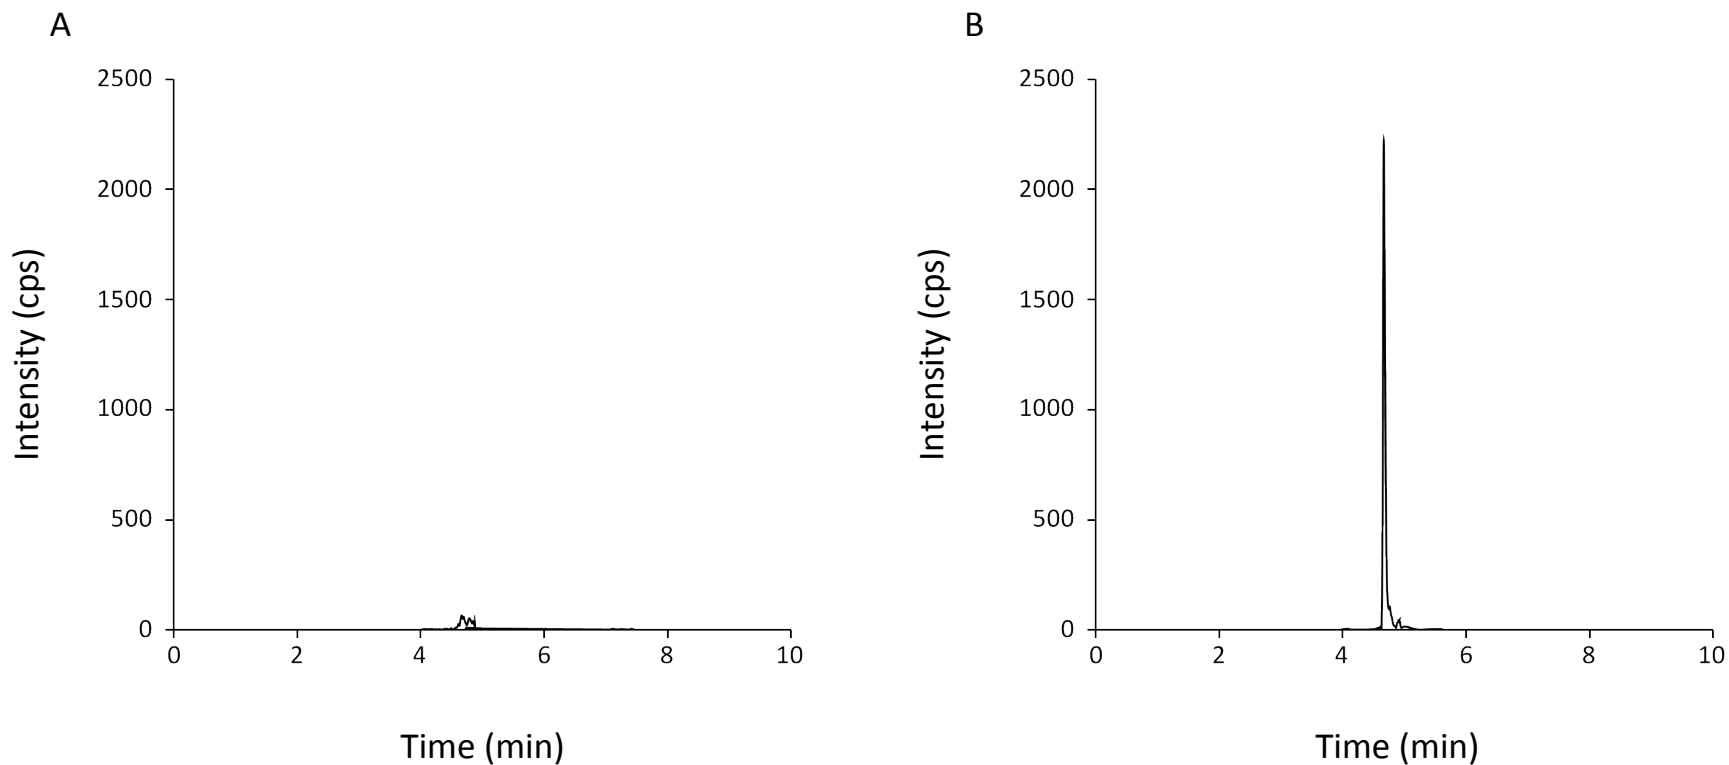

Supplemental Fig. 1 Examination of ionization suppression comparing the peak areas of surrogate peptide in serum digests between with and without a Protein G column.

(A) The peak of surrogate peptide in  $100 \mu\text{g mL}^{-1}$  nivolumab-spiked serum digests without a Protein G column.

(B) The peak of surrogate peptide in  $100 \mu\text{g mL}^{-1}$  nivolumab-spiked serum digests with a Protein G column.
