# Supplementary material for: Quantitative LC-MS/MS method for nivolumab in human serum using IgG purification and immobilized tryptic digestion
Source: Royal Society of Chemistry journal article supplement (doi:10.1039/c9ay02087j), 2019-11-25
Supplement: c9ay02087j2.pdf [file c9ay02087j2.pdf]

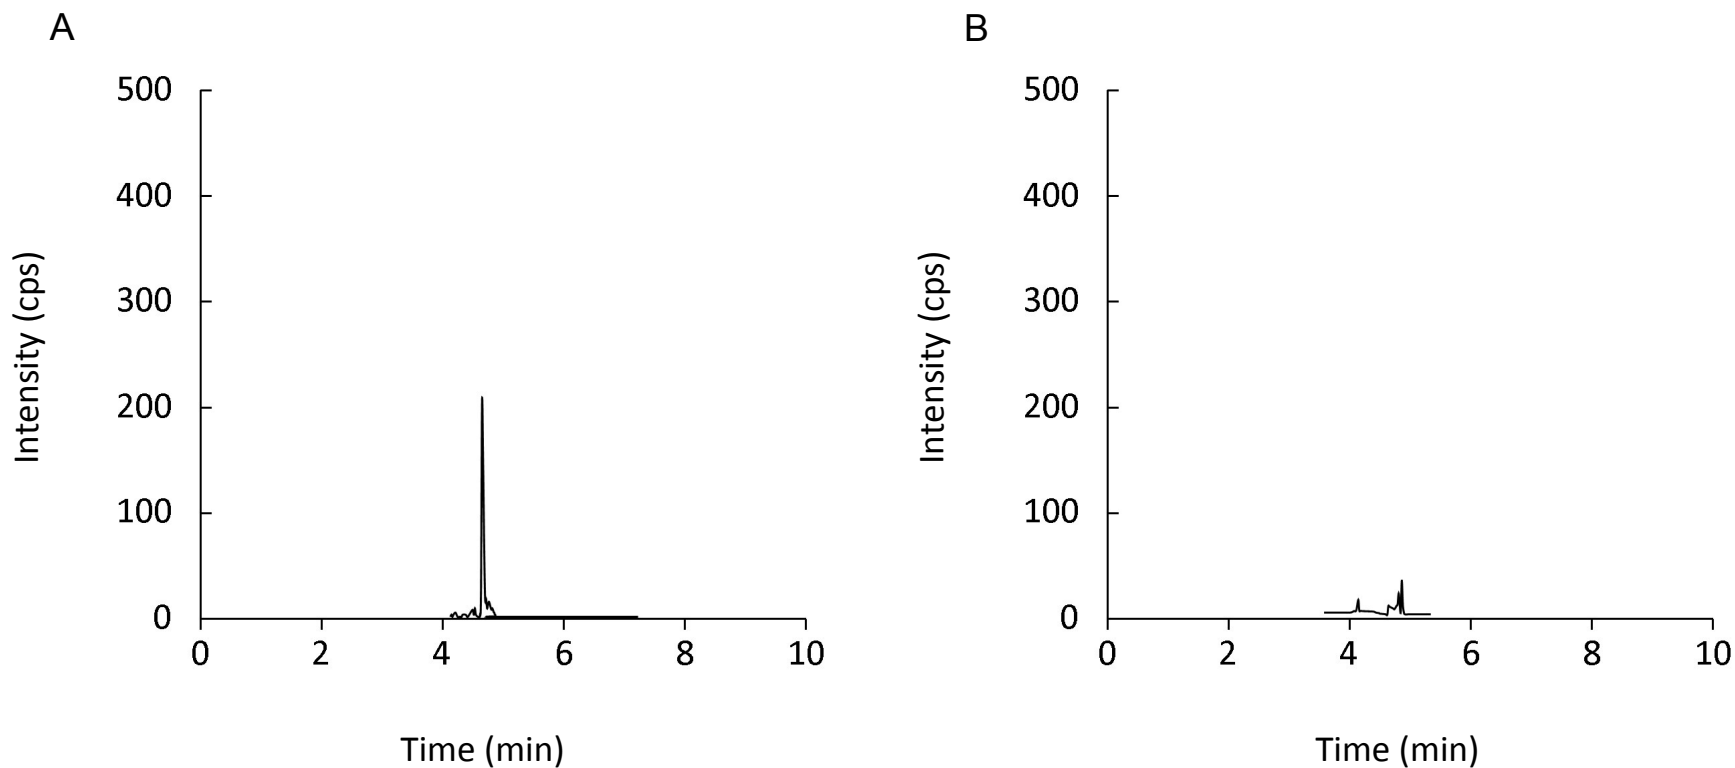

Supplemental Fig. 2 Investigation of carryover effect comparing  $2 \mu\text{g mL}^{-1}$  nivolumab-spiked serum digests with mobile phase after injection of  $200 \mu\text{g mL}^{-1}$  nivolumab-spiked serum digests.

(A) The peak of surrogate peptide in  $2 \mu\text{g mL}^{-1}$  nivolumab-spiked serum digests.

(B) The peak of surrogate peptide in mobile phase after injection of  $200 \mu\text{g mL}^{-1}$  nivolumab-spiked serum digests.
